# Supplementary material
Source: Springer Nature journal article supplement (https://www.springermedizin.de/resource/supplementary/12960_2012_322_MOESM4_ESM.pdf/9569900)

■ Domestic public medical schools ■ Domestic private medical school ■ Foreign medical schools

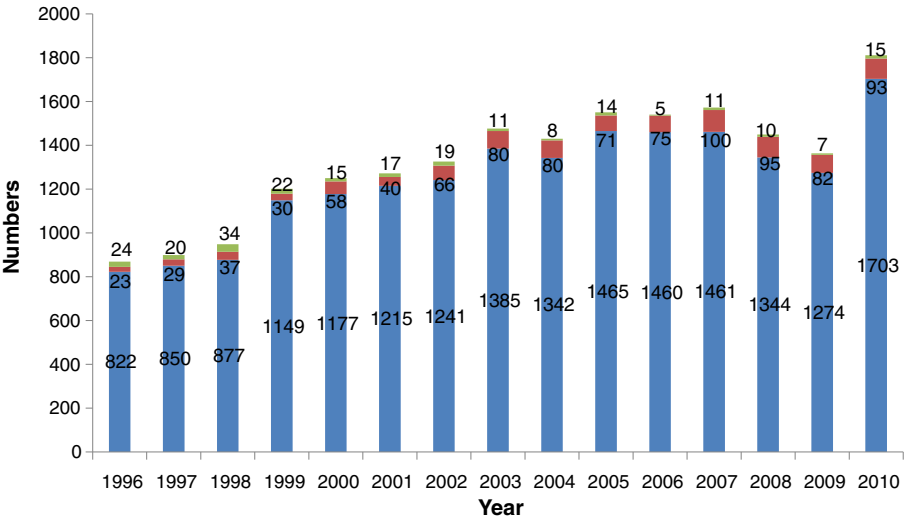

Supplement: MOESM4 [file 9569900]
